# Supplementary material for: Laser spectroscopy of YBr: rotational analysis of the C1Σ–X1Σ system
Source: Royal Society of Chemistry journal article supplement (doi:10.1039/b105895a), 2001-01-01
Supplement: lines.pdf [file lines.pdf]

Assigned Rotational lines of the  $C^1\Sigma - X^1\Sigma$  Electronic Transition of YBr ( $\text{cm}^{-1}$ )

| J  | $Y^{79}\text{Br}$ (0,0) band |             | $Y^{81}\text{Br}$ (0,0) band |             |
|----|------------------------------|-------------|------------------------------|-------------|
|    | P                            | R           | P                            | R           |
| 0  |                              |             |                              | 13895.7174  |
| 1  | 13895.3485*                  | 13895.7065  | 13895.4769                   | 13895.8279  |
| 2  | 13895.2185                   | 13895.8107  | 13895.3485*                  | 13895.9308  |
| 3  | 13895.0803                   | 13895.9078  | 13895.2096                   | 13896.0261  |
| 4  | 13894.9331                   | 13895.9978  | 13895.0655                   | 13896.1162* |
| 5  | 13894.7798                   | 13896.0808  | 13894.9122                   | 13896.1963  |
| 6  | 13894.6188                   | 13896.1558* | 13894.7540                   | 13896.2719  |
| 7  | 13894.4507                   | 13896.2269  | 13894.5882                   | 13896.3419* |
| 8  | 13894.2752                   | 13896.2873  | 13894.4162                   | 13896.4006  |
| 9  | 13894.0932                   | 13896.3419* | 13894.2357                   | 13896.4534  |
| 10 | 13893.9044                   | 13896.3893  | 13894.0497                   | 13896.5009* |
| 11 | 13893.7094                   | 13896.4283* | 13893.8556                   | 13896.5416  |
| 12 | 13893.5056                   | 13896.4618  | 13893.6567                   | 13896.5739  |
| 13 | 13893.2959                   | 13896.4899  | 13893.4465                   | 13896.5997  |
| 14 | 13893.0785                   | 13896.5096  | 13893.2353                   | 13896.6201  |
| 15 | 13892.8547                   | 13896.5215  | 13893.0135                   | 13896.6336* |
| 16 | 13892.6235                   | 13896.5241* | 13892.7833                   | 13896.6336* |
| 17 | 13892.3851                   | 13896.5241* | 13892.5498                   | 13896.6336* |
| 18 | 13892.1402                   | 13896.5151  | 13892.3079                   | 13896.6255  |
| 19 | 13891.8888                   | 13896.5009* | 13892.0586                   | 13896.6088  |
| 20 | 13891.6279                   | 13896.4763* | 13891.8034                   | 13896.5871  |
| 21 | 13891.3618                   | 13896.4457  | 13891.5402                   | 13896.5574  |
| 22 | 13891.0864                   | 13896.4084  | 13891.2691                   | 13896.5241* |
| 23 | 13890.8064                   | 13896.3663  | 13890.9921                   | 13896.4763* |
| 24 | 13890.5182                   | 13896.3124  | 13890.7076                   | 13896.4283* |
| 25 | 13890.2224                   | 13896.2549  | 13890.4165                   | 13896.3663  |
| 26 | 13889.9217                   | 13896.1904  | 13890.1179                   | 13896.3041  |
| 27 | 13889.6117                   | 13896.1162* | 13889.8128                   | 13896.2316  |
| 28 | 13889.2948                   | 13896.0357  | 13889.4999                   | 13896.1558* |
| 29 | 13888.9726                   | 13895.9495  | 13889.1823                   | 13896.0678  |
| 30 | 13888.6425                   | 13895.8564  | 13888.8555                   | 13895.9747  |
| 31 | 13888.3052                   | 13895.7544  | 13888.5240                   | 13895.8758  |
| 32 | 13887.9607                   | 13895.6466  | 13888.1841                   | 13895.7685  |
| 33 | 13887.6094                   | 13895.5326* | 13887.8358                   | 13895.6537  |
| 34 | 13887.2513                   | 13895.4062* | 13887.4825                   | 13895.5326* |
| 35 | 13886.8852                   | 13895.2777  | 13887.1216                   | 13895.4062* |
| 36 | 13886.5135                   | 13895.1423  | 13886.7538                   | 13895.2719  |
| 37 | 13886.1334                   | 13894.9979  | 13886.3800                   | 13895.1298  |
| 38 | 13885.7463                   | 13894.8471  | 13885.9983                   | 13894.9803  |
| 39 | 13885.3522                   | 13894.6891  | 13885.6087                   | 13894.8240  |
| 40 |                              | 13894.5236  |                              | 13894.6609  |
| 41 |                              | 13894.3508  |                              | 13894.4905  |
| 42 |                              | 13894.1718  |                              | 13894.3130  |
| 43 |                              | 13893.9853  |                              | 13894.1278  |
| 44 |                              | 13893.7918  |                              | 13893.9383  |
| 45 |                              | 13893.5920  |                              | 13893.7413  |
| 46 |                              | 13893.3820  |                              | 13893.5358  |
| 47 |                              | 13893.1692  |                              | 13893.3224  |
| 48 |                              | 13892.9492  |                              | 13893.1024  |
| 49 |                              | 13892.7163  |                              | 13892.8788  |
| 50 |                              | 13892.4817  |                              | 13892.6442  |
| 51 |                              | 13892.2381  |                              | 13892.4040  |
| 52 |                              | 13891.9873  |                              | 13892.1571  |
| 53 |                              | 13891.7294  |                              |             |
| 54 |                              | 13891.4638  |                              |             |
| 55 |                              | 13891.1922  |                              |             |
| 56 |                              | 13890.9119  |                              |             |
| 57 |                              | 13890.6264  |                              |             |

\*indicate overlapped with another line.

Assigned Rotational lines of the  $C^1\Sigma - X^1\Sigma$  Electronic Transition of  $Y^{79}\text{Br}$  ( $\text{cm}^{-1}$ )

| J  | (0,1)band  |             | (0,2)band  |             |
|----|------------|-------------|------------|-------------|
|    | P          | R           | P          | R           |
| 1  | 13625.3425 | 13625.6997  | 13356.5298 | 13356.8863  |
| 2  | 13625.2087 | 13625.8017  | 13356.3973 | 13356.9912  |
| 3  | 13625.0698 | 13625.9005  | 13356.262  | 13357.0891  |
| 4  | 13624.9279 | 13625.9922  | 13356.1183 | 13357.1828  |
| 5  | 13624.7756 | 13626.0769  | 13355.9677 | 13357.2694  |
| 6  | 13624.6171 | 13626.1553  | 13355.8116 | 13357.3512  |
| 7  | 13624.4520 | 13626.2271  | 13355.6495 | 13357.4241  |
| 8  | 13624.2791 | 13626.2909  | 13355.4809 | 13357.4918  |
| 9  | 13624.1020 | 13626.3510* | 13355.3060 | 13357.5544  |
| 10 | 13623.9162 | 13626.4001  | 13355.1249 | 13357.6103  |
| 11 | 13623.7248 | 13626.4453  | 13354.9379 | 13357.6590  |
| 12 | 13623.5272 | 13626.4831  | 13354.7440 | 13357.7016  |
| 13 | 13623.3238 | 13626.5145* | 13354.5439 | 13357.7382  |
| 14 | 13623.1094 | 13626.5406  | 13354.3376 | 13357.7681  |
| 15 | 13622.8917 | 13626.5602  | 13354.1244 | 13357.7940  |
| 16 | 13622.6662 | 13626.5713* | 13353.9067 | 13357.8090  |
| 17 | 13622.4350 | 13626.5713* | 13353.6820 | 13357.8239  |
| 18 | 13622.1964 | 13626.5713* | 13353.4505 | 13357.8259* |
| 19 | 13621.9511 | 13626.5630  | 13353.2134 | 13357.8259* |
| 20 | 13621.7001 | 13626.5471  | 13352.9713 | 13357.8173  |
| 21 | 13621.4405 | 13626.5250  | 13352.7198 | 13357.8035  |
| 22 | 13621.1761 | 13626.4963  | 13352.4647 | 13357.7829  |
| 23 | 13620.9046 | 13626.4621  | 13352.2015 | 13357.7570  |
| 24 | 13620.6255 | 13626.4190  | 13351.9325 | 13357.7234  |
| 25 | 13620.3410 | 13626.3706  | 13351.6572 | 13357.6842  |
| 26 | 13620.0497 | 13626.3155  | 13351.3756 | 13357.6397  |
| 27 | 13619.7523 | 13626.2530  | 13351.0876 | 13357.5866  |
| 28 | 13619.4459 | 13626.1857  | 13350.7922 | 13357.5295  |
| 29 | 13619.1333 | 13626.1092  | 13350.4921 | 13357.4647  |
| 30 | 13618.8145 | 13626.0259  | 13350.1847 | 13357.3937  |
| 31 | 13618.4894 | 13625.9378  | 13349.8721 | 13357.3175  |
| 32 | 13618.1572 | 13625.8413  | 13349.5527 | 13357.2342  |
| 33 | 13617.8189 | 13625.7396  | 13349.2272 | 13357.1437  |
| 34 | 13617.4714 | 13625.6311  | 13348.8940 | 13357.0485  |
| 35 | 13617.1206 | 13625.5137  | 13348.5561 | 13356.9453  |
| 36 | 13616.7623 | 13625.3910  | 13348.2113 | 13356.8363  |
| 37 | 13616.3976 | 13625.2603  | 13347.8600 | 13356.7220  |
| 38 | 13616.0243 | 13625.1240  | 13347.5026 | 13356.6008  |
| 39 | 13615.6478 | 13624.9835  |            | 13356.4725  |
| 40 | 13615.2620 | 13624.8339  |            | 13356.3395  |
| 41 |            | 13624.6776  |            | 13356.1989  |
| 42 |            | 13624.5145  |            | 13356.0508  |
| 43 |            | 13624.3440  |            | 13355.8971  |
| 44 |            | 13624.1682  |            | 13355.7394  |
| 45 |            | 13623.9842  |            |             |
| 46 |            | 13623.7970  |            |             |

\*indicate overlapped with another line.

Assigned Rotational lines of the  $C^1\Sigma - X^1\Sigma$  Electronic Transition of  $Y^{79}\text{Br}$  ( $\text{cm}^{-1}$ )

| J  | (0,3)band  |             | (1,2)band  |             |
|----|------------|-------------|------------|-------------|
|    | P          | R           | P          | R           |
| 1  | 13088.9157 | 13089.2720* | 13588.1862 | 13588.5397* |
| 2  | 13088.7854 | 13089.3783* | 13588.0561 | 13588.6449* |
| 3  | 13088.6489 | 13089.4789* | 13587.9172 | 13588.7441* |
| 4  | 13088.5078 | 13089.5731* | 13587.7732 | 13588.8333* |
| 5  | 13088.3587 | 13089.6630* | 13587.6209 | 13588.9167* |
| 6  | 13088.2062 | 13089.7447* | 13587.4626 | 13588.9962* |
| 7  | 13088.0459 | 13089.8221* | 13587.2982 | 13589.0667* |
| 8  | 13087.8797 | 13089.8934* | 13587.1257 | 13589.1314* |
| 9  | 13087.7095 | 13089.9578* | 13586.9493 | 13589.1887* |
| 10 | 13087.5313 | 13090.0169* | 13586.7643 | 13589.2394* |
| 11 | 13087.3482 | 13090.0701* | 13586.5714 | 13589.2825* |
| 12 | 13087.1597 | 13090.1175* | 13586.3728 | 13589.3191* |
| 13 | 13086.9655 | 13090.1589* | 13586.1689 | 13589.3505* |
| 14 | 13086.7642 | 13090.1949* | 13585.9551 | 13589.3746* |
| 15 | 13086.5567 | 13090.2243* | 13585.7378 | 13589.3916* |
| 16 | 13086.3455 | 13090.2479* | 13585.5130 | 13589.4019* |
| 17 | 13086.1276 | 13090.2655* | 13585.2801 | 13589.4019* |
| 18 | 13085.9039 | 13090.2770* | 13585.0423 | 13589.4019* |
| 19 | 13085.6726 | 13090.2821* | 13584.7947 | 13589.3916* |
| 20 | 13085.4354 | 13090.2821* | 13584.5433 | 13589.3746* |
| 21 | 13085.1935 | 13090.2770* | 13584.2840 | 13589.3505* |
| 22 | 13084.9460 | 13090.2655* | 13584.0185 | 13589.3191* |
| 23 | 13084.6904 | 13090.2479* | 13583.7460 | 13589.2825* |
| 24 | 13084.4318 | 13090.2243* | 13583.4672 | 13589.2394* |
| 25 | 13084.1664 | 13090.1949* | 13583.1791 | 13589.1887* |
| 26 | 13083.8944 | 13090.1589* | 13582.8879 | 13589.1314* |
| 27 | 13083.6155 | 13090.1175* | 13582.5883 | 13589.0667* |
| 28 | 13083.3324 | 13090.0701* | 13582.2818 | 13588.9962* |
| 29 | 13083.0436 | 13090.0169* | 13581.9706 | 13588.9167* |
| 30 | 13082.7484 | 13089.9578* | 13581.6514 | 13588.8333* |
| 31 | 13082.4463 | 13089.8934* | 13581.3248 | 13588.7441* |
| 32 | 13082.1400 | 13089.8221* | 13580.9906 | 13588.6449* |
| 33 | 13081.8271 | 13089.7447* | 13580.6508 | 13588.5397* |
| 34 | 13081.5090 | 13089.6630* | 13580.3037 | 13588.4286  |
| 35 | 13081.1851 | 13089.5731* |            |             |
| 36 |            | 13089.4789* |            |             |
| 37 |            | 13089.3783* |            |             |
| 38 |            | 13089.2720* |            |             |
| 39 |            | 13089.1599  |            |             |

\*indicate overlapped with another line.

Assigned Rotational lines of the  $C^1\Sigma - X^1\Sigma$  Electronic Transition of  $Y^{79}\text{Br}$  ( $\text{cm}^{-1}$ )

| J  | (1,3) band |             | (1,4) band  |             |
|----|------------|-------------|-------------|-------------|
|    | P          | R           | P           | R           |
| 1  | 13320.5742 |             |             |             |
| 2  | 13320.4438 | 13321.0319  | 13054.0186  | 13054.6077  |
| 3  | 13320.3063 | 13321.1314  | 13053.8838  | 13054.7090  |
| 4  | 13320.1624 | 13321.2230  | 13053.7419  | 13054.8023  |
| 5  | 13320.0140 | 13321.3093  | 13053.5939  | 13054.8894  |
| 6  | 13319.8582 | 13321.3907  | 13053.4408  | 13054.9716  |
| 7  | 13319.6944 | 13321.4636  | 13053.2820  | 13055.0482  |
| 8  | 13319.5263 | 13321.5307  | 13053.1160  | 13055.1182  |
| 9  | 13319.3505 | 13321.5909  | 13052.9444  | 13055.1814  |
| 10 | 13319.1706 | 13321.6447  | 13052.7669  | 13055.2400  |
| 11 | 13318.9827 | 13321.6932  | 13052.5845  | 13055.2931* |
| 12 | 13318.7892 | 13321.7382* | 13052.3948* | 13055.3397  |
| 13 | 13318.5891 | 13321.7735* | 13052.1995  | 13055.3818  |
| 14 | 13318.3822 | 13321.8017* | 13051.9978  | 13055.4171  |
| 15 | 13318.1699 | 13321.8236* | 13051.7915  | 13055.4463  |
| 16 | 13317.9501 | 13321.8414* | 13051.5781  | 13055.4687  |
| 17 | 13317.7243 | 13321.8499* | 13051.3597  | 13055.4849  |
| 18 | 13317.4926 | 13321.8499* | 13051.1342  | 13055.4945  |
| 19 | 13317.2542 | 13321.8499* | 13050.9038  | 13055.4961  |
| 20 | 13317.0093 | 13321.8414* | 13050.6674  | 13055.4980  |
| 21 | 13316.7591 | 13321.8236* | 13050.4231  | 13055.4904  |
| 22 | 13316.5017 | 13321.8017* | 13050.1748  | 13055.4779  |
| 23 | 13316.2381 | 13321.7735* | 13049.9197  | 13055.4594  |
| 24 | 13315.9679 | 13321.7382* | 13049.6596  | 13055.4344  |
| 25 | 13315.6921 | 13321.6989  | 13049.3927  | 13055.4023  |
| 26 | 13315.4090 | 13321.6515  | 13049.1203  | 13055.3638  |
| 27 | 13315.1201 | 13321.5981  | 13048.8415  | 13055.3204  |
| 28 | 13314.8248 | 13321.5385  | 13048.5572  | 13055.2697  |
| 29 | 13314.5236 | 13321.4725  | 13048.2676  | 13055.2157  |
| 30 | 13314.2151 | 13321.3990  | 13047.9712  | 13055.1533  |
| 31 |            | 13321.3208  |             | 13055.0892  |
| 32 |            | 13321.2345  |             | 13055.0129  |
| 33 |            | 13321.1427  |             | 13054.9351  |
| 34 |            | 13321.0455  |             | 13054.8514  |
| 35 |            | 13320.9414  |             | 13054.7593  |
| 36 |            | 13320.8300  |             | 13054.6619  |
| 37 |            | 13320.7128  |             | 13054.5596  |
| 38 |            | 13320.5900  |             |             |
| 39 |            | 13320.4609  |             |             |
| 40 |            | 13320.3226  |             |             |
| 41 |            | 13320.1794  |             |             |
| 42 |            | 13320.0312  |             |             |
| 43 |            | 13319.8745  |             |             |
| 44 |            | 13319.7123  |             |             |
| 45 |            | 13319.5443  |             |             |
| 46 |            | 13319.3676  |             |             |
| 47 |            | 13319.1880  |             |             |
| 48 |            | 13318.9978  |             |             |
| 49 |            | 13318.8063  |             |             |
| 50 |            | 13318.6067  |             |             |

\*indicate overlapped with another line.

Assigned Rotational lines of the  $C^1\Sigma - X^1\Sigma$  Electronic Transition of  $Y^{79}\text{Br}$  ( $\text{cm}^{-1}$ )

---

(2,4) band

---

| J  | P          | R           |
|----|------------|-------------|
| 1  |            | 13284.9171  |
| 2  | 13284.4331 | 13285.0222  |
| 3  | 13284.2981 | 13285.1186  |
| 4  | 13284.1568 | 13285.2115  |
| 5  | 13284.0055 | 13285.2967  |
| 6  | 13283.8503 | 13285.3746  |
| 7  | 13283.6879 | 13285.4477  |
| 8  | 13283.5194 | 13285.5139  |
| 9  | 13283.3453 | 13285.5750  |
| 10 | 13283.1637 | 13285.6287  |
| 11 | 13282.9756 | 13285.6741  |
| 12 | 13282.7808 | 13285.7156  |
| 13 | 13282.5817 | 13285.7498  |
| 14 | 13282.3727 | 13285.7768  |
| 15 | 13282.1604 | 13285.7984  |
| 16 | 13281.9410 | 13285.8135  |
| 17 | 13281.7148 | 13285.8239* |
| 18 | 13281.4826 | 13285.8239* |
| 19 | 13281.2431 | 13285.8239* |
| 20 | 13280.9979 | 13285.8100  |
| 21 | 13280.7476 | 13285.7953  |
| 22 | 13280.4885 | 13285.7700  |
| 23 | 13280.2250 | 13285.7401  |
| 24 | 13279.9538 | 13285.7055  |
| 25 | 13279.6772 | 13285.6630  |
| 26 | 13279.3925 | 13285.6133  |
| 27 | 13279.1030 | 13285.5583  |
| 28 | 13278.8071 | 13285.4961  |
| 29 | 13278.5050 | 13285.4276  |
| 30 | 13278.1949 | 13285.3528  |
| 31 | 13277.8795 | 13285.2720  |
| 32 | 13277.5579 | 13285.1844  |
| 33 | 13277.2289 | 13285.0901  |
| 34 | 13276.8944 | 13284.9905  |
| 35 | 13276.5538 | 13284.8814  |
| 36 | 13276.2046 | 13284.7691  |
| 37 | 13275.8513 | 13284.6524  |
| 38 |            | 13284.5251  |
| 39 |            | 13284.3911  |
| 40 |            | 13284.2526  |
| 41 |            | 13284.1063  |
| 42 |            | 13283.9568  |
| 43 |            | 13283.7985  |
| 44 |            | 13283.6349  |
| 45 |            | 13283.4638  |
| 46 |            | 13283.2842  |
| 47 |            | 13283.0994  |
| 48 |            | 13282.9114  |
| 49 |            | 13282.7128  |

---

\*indicate overlapped with another line.

Assigned Rotational lines of the  $C^1\Sigma - X^1\Sigma$  Electronic Transition of  $Y^{81}\text{Br}$  ( $\text{cm}^{-1}$ )

| J  | (0,1) band  |             | (0,2) band |             |
|----|-------------|-------------|------------|-------------|
|    | P           | R           | P          | R           |
| 0  |             | 13627.4710  |            |             |
| 1  | 13627.2315  | 13627.5817  | 13360.1648 | 13360.5162  |
| 2  | 13627.1010  | 13627.6842  | 13360.0370 | 13360.6205  |
| 3  | 13626.9648  | 13627.7816  | 13359.9041 | 13360.7179  |
| 4  | 13626.8223  | 13627.8718  | 13359.7622 | 13360.8100  |
| 5  | 13626.6728  | 13627.9567  | 13359.6146 | 13360.8965  |
| 6  | 13626.5145* | 13628.0331  | 13359.4595 | 13360.9753  |
| 7  | 13626.3510* | 13628.1036  | 13359.2996 | 13361.0497  |
| 8  | 13626.1857  | 13628.1675  | 13359.1345 | 13361.1170  |
| 9  | 13626.0085  | 13628.2248  | 13358.9603 | 13361.1775  |
| 10 | 13625.8253  | 13628.2762  | 13358.7823 | 13361.2319  |
| 11 | 13625.6358  | 13628.3201  | 13358.5967 | 13361.2795  |
| 12 | 13625.4401  | 13628.3575  | 13358.4068 | 13361.3225  |
| 13 | 13625.2366  | 13628.3881  | 13358.2086 | 13361.3582  |
| 14 | 13625.0293  | 13628.4135  | 13358.0057 | 13361.3883  |
| 15 | 13624.8140  | 13628.4340* | 13357.7940 | 13361.4121  |
| 16 | 13624.5913  | 13628.4438* | 13357.5793 | 13361.4290  |
| 17 | 13624.3631  | 13628.4438* | 13357.3554 | 13361.4430* |
| 18 | 13624.1270  | 13628.4438* | 13357.1276 | 13361.4430* |
| 19 | 13623.8853  | 13628.4340* | 13356.8934 | 13361.4430* |
| 20 | 13623.6371  | 13628.4193  | 13356.6520 | 13361.4358  |
| 21 | 13623.3829  | 13628.3979  | 13356.4053 | 13361.4237  |
| 22 | 13623.1178  | 13628.3700  | 13356.1514 | 13361.4027  |
| 23 | 13622.8513  | 13628.3357  | 13355.8910 | 13361.3754  |
| 24 | 13622.5758  | 13628.2940  | 13355.6252 | 13361.3424  |
| 25 | 13622.2950  | 13628.2456  | 13355.3541 | 13361.3042  |
| 26 | 13622.0064  | 13628.1906  | 13355.0758 | 13361.2592  |
| 27 | 13621.7115  | 13628.1289  | 13354.7913 | 13361.2084  |
| 28 | 13621.4096  | 13628.0612  | 13354.5005 | 13361.1513  |
| 29 | 13621.1036  | 13627.9867  | 13354.2032 | 13361.0868  |
| 30 | 13620.7882  | 13627.9057  | 13353.9029 | 13361.0168  |
| 31 | 13620.4685  | 13627.8162  | 13353.5922 | 13360.9403  |
| 32 | 13620.1400  | 13627.7225  | 13353.2776 | 13360.8588  |
| 33 | 13619.8033  | 13627.6212  | 13352.9562 | 13360.7703  |
| 34 | 13619.4654  | 13627.5139  | 13352.6296 | 13360.6753  |
| 35 | 13619.1174  | 13627.3991  | 13352.2949 | 13360.5741  |
| 36 | 13618.7644  | 13627.2782  | 13351.9554 | 13360.4671  |
| 37 | 13618.4032  | 13627.1502  | 13351.6087 | 13360.3542  |
| 38 | 13618.0338  | 13627.0157  | 13351.2561 | 13360.2339  |
| 39 | 13617.6601  | 13626.8750  | 13350.8965 | 13360.1087  |
| 40 | 13617.2793  | 13626.7275  | 13350.5323 | 13359.9750  |
| 41 | 13616.8942  | 13626.5713  | 13350.1592 | 13359.8374  |
| 42 | 13616.5006  | 13626.4143  | 13349.7808 | 13359.6929  |
| 43 | 13616.0992  | 13626.2468  | 13349.3939 | 13359.5423  |
| 44 | 13615.6932  | 13626.0701  | 13349.0106 | 13359.3833  |
| 45 | 13615.2791  | 13625.8913  | 13348.6115 | 13359.2202  |
| 46 |             | 13625.7028  | 13348.2085 | 13359.0511  |
| 47 |             | 13625.5121  |            | 13358.8730  |
| 48 |             | 13625.3078  |            | 13358.6899  |
| 49 |             | 13625.0974  |            | 13358.5038  |
| 50 |             | 13624.8852  |            |             |

\*indicate overlapped with another line.

Assigned Rotational lines of the  $C^1\Sigma - X^1\Sigma$  Electronic Transition of  $Y^{81}\text{Br}$  ( $\text{cm}^{-1}$ )

| (0,3) band |             |             | (1,2) band |             |
|------------|-------------|-------------|------------|-------------|
| J          | P           | R           | P          | R           |
| 0          |             | 13094.5244* |            | 13590.5525* |
| 1          | 13094.2836  | 13094.6350* | 13590.3142 | 13590.6629* |
| 2          | 13094.1567  | 13094.7400* | 13590.1839 | 13590.7663* |
| 3          | 13094.0225  | 13094.8403* | 13590.0479 | 13590.8624* |
| 4          | 13093.8835  | 13094.9338* | 13589.9049 | 13590.9533* |
| 5          | 13093.7380  | 13095.0216* | 13589.7558 | 13591.0367* |
| 6          | 13093.5859  | 13095.1038* | 13589.5999 | 13591.1133* |
| 7          | 13093.4289  | 13095.1799* | 13589.4372 | 13591.1827* |
| 8          | 13093.2648  | 13095.2500* | 13589.2682 | 13591.2466* |
| 9          | 13093.0947  | 13095.3144* | 13589.0916 | 13591.3026* |
| 10         | 13092.9205  | 13095.3729* | 13588.9081 | 13591.3525* |
| 11         | 13092.7395  | 13095.4252* | 13588.7194 | 13591.3960* |
| 12         | 13092.5531  | 13095.4717* | 13588.5229 | 13591.4320* |
| 13         | 13092.3606  | 13095.5121* | 13588.3194 | 13591.4613* |
| 14         | 13092.1616  | 13095.5480* | 13588.1122 | 13591.4852* |
| 15         | 13091.9583  | 13095.5775* | 13587.8951 | 13591.5024* |
| 16         | 13091.7485  | 13095.6010* | 13587.6729 | 13591.5122* |
| 17         | 13091.5326  | 13095.6180* | 13587.4435 | 13591.5122* |
| 18         | 13091.3121  | 13095.6288* | 13587.2079 | 13591.5122* |
| 19         | 13091.0828  | 13095.6352* | 13586.9658 | 13591.5024* |
| 20         | 13090.8503  | 13095.6352* | 13586.7173 | 13591.4852* |
| 21         | 13090.6103  | 13095.6288* | 13586.4606 | 13591.4613* |
| 22         | 13090.3657  | 13095.6180* | 13586.1996 | 13591.4320* |
| 23         | 13090.1175* | 13095.6010* | 13585.9292 | 13591.3960* |
| 24         | 13089.8578  | 13095.5775* | 13585.6555 | 13591.3525* |
| 25         | 13089.5957  | 13095.5480* | 13585.3720 | 13591.3026* |
| 26         | 13089.3267  | 13095.5121* | 13585.0838 | 13591.2466* |
| 27         | 13089.0533  | 13095.4717* | 13584.7874 | 13591.1827* |
| 28         | 13088.7717  | 13095.4252* | 13584.4836 | 13591.1133* |
| 29         | 13088.4875  | 13095.3729* | 13584.1755 | 13591.0367* |
| 30         | 13088.1949  | 13095.3144* | 13583.8601 | 13590.9533* |
| 31         | 13087.8993  | 13095.2500* | 13583.5381 | 13590.8624* |
| 32         | 13087.5941  | 13095.1799* | 13583.2092 | 13590.7663* |
| 33         | 13087.2840  | 13095.1038* | 13582.8738 | 13590.6629* |
| 34         | 13086.9691  | 13095.0216* | 13582.5309 | 13590.5525* |
| 35         | 13086.6484  | 13094.9338* | 13582.1819 | 13590.4360  |
| 36         | 13086.3264  | 13094.8403* | 13581.8275 |             |
| 37         | 13085.9929  | 13094.7401* | 13581.4660 |             |
| 38         | 13085.6523  | 13094.6350* | 13581.0972 |             |
| 39         | 13085.3073  | 13094.5244* | 13580.7225 |             |
| 40         | 13084.9599  | 13094.4049  | 13580.3384 |             |
| 41         | 13084.6028  |             |            |             |

\*indicate overlapped with another line.

Assigned Rotational lines of the  $C^1\Sigma - X^1\Sigma$  Electronic Transition of  $Y^{81}\text{Br}$  ( $\text{cm}^{-1}$ )

| J  | (1,3) band  |             | (1,4)band   |             |
|----|-------------|-------------|-------------|-------------|
|    | P           | R           | P           | R           |
| 1  |             | 13324.7799  | 13059.7246  | 13060.0747  |
| 2  | 13324.3027  | 13324.8832  | 13059.5955  | 13060.1791  |
| 3  | 13324.1693  | 13324.9830  | 13059.4621  | 13060.2768  |
| 4  | 13324.0263  | 13325.0733  | 13059.3216  | 13060.3691  |
| 5  | 13323.8793  | 13325.1580  | 13059.1763  | 13060.4551  |
| 6  | 13323.7258  | 13325.2364  | 13059.0239  | 13060.5372  |
| 7  | 13323.5654  | 13325.3096  | 13058.8685  | 13060.6126  |
| 8  | 13323.3982  | 13325.3761  | 13058.7042  | 13060.6818  |
| 9  | 13323.2250  | 13325.4362  | 13058.5343  | 13060.7441  |
| 10 | 13323.0474  | 13325.4912  | 13058.3605  | 13060.8023  |
| 11 | 13322.8618  | 13325.5372  | 13058.1794  | 13060.8536  |
| 12 | 13322.6700  | 13325.5811* | 13057.9924  | 13060.8998  |
| 13 | 13322.4730  | 13325.6153* | 13057.8005  | 13060.9402  |
| 14 | 13322.2703  | 13325.6439* | 13057.6020  | 13060.9724  |
| 15 | 13322.0597  | 13325.6662* | 13057.3966  | 13061.0010  |
| 16 | 13321.8414* | 13325.6822* | 13057.1867  | 13061.0227  |
| 17 | 13321.6197  | 13325.6919* | 13056.9710  | 13061.0398  |
| 18 | 13321.3907  | 13325.6919* | 13056.7488  | 13061.0521* |
| 19 | 13321.1563  | 13325.6919* | 13056.5201  | 13061.0521* |
| 20 | 13320.9139  | 13325.6822* | 13056.2866  | 13061.0521* |
| 21 | 13320.6669  | 13325.6662* | 13056.0460  | 13061.0454  |
| 22 | 13320.4125  | 13325.6439* | 13055.8012  | 13061.0331  |
| 23 | 13320.1527  | 13325.6153* | 13055.5466  | 13061.0131  |
| 24 | 13319.8857  | 13325.5811* | 13055.2931* | 13060.9870  |
| 25 | 13319.6125  | 13325.5400  | 13055.0281  | 13060.9569  |
| 26 | 13319.3336  | 13325.4949  | 13054.7593  | 13060.9208  |
| 27 | 13319.0480  | 13325.4424  | 13054.4846  | 13060.8769  |
| 28 | 13318.7572  | 13325.3823  | 13054.2026  | 13060.8294  |
| 29 | 13318.4597  | 13325.3183  | 13053.9168  | 13060.7763  |
| 30 | 13318.1552  | 13325.2445  | 13053.6240  | 13060.7137  |
| 31 | 13317.8453  | 13325.1674  | 13053.3240  | 13060.6480  |
| 32 | 13317.5287  | 13325.0842  | 13053.0210  | 13060.5739  |
| 33 | 13317.2047  | 13324.9924  | 13052.7112  | 13060.4961  |
| 34 | 13316.8749  | 13324.8969  | 13052.3948* | 13060.4134  |
| 35 | 13316.5405  | 13324.7927  | 13052.0710  | 13060.3215  |
| 36 | 13316.1986  | 13324.6824  | 13051.7450  | 13060.2253  |
| 37 | 13315.8508  | 13324.5666  | 13051.4102  | 13060.1262  |
| 38 | 13315.4965  | 13324.4445  | 13051.0703  | 13060.0181  |
| 39 | 13315.1342  | 13324.3159  | 13050.7239  | 13059.9044  |
| 40 | 13314.7680  | 13324.1817  | 13050.3694  | 13059.7839  |
| 41 | 13314.3952  | 13324.0376  | 13050.0155  | 13059.6580  |
| 42 | 13314.0174  | 13323.8927  |             |             |

\*indicate overlapped with another line.



Assigned Rotational lines of the  $C^1\Sigma - X^1\Sigma$  Electronic Transition of  $Y^{81}\text{Br}$  ( $\text{cm}^{-1}$ )

---

| (2,4)band |            |             |
|-----------|------------|-------------|
| J         | P          | R           |
| 1         |            | 13288.9926  |
| 2         | 13288.5159 | 13289.0952  |
| 3         | 13288.3824 | 13289.1922  |
| 4         | 13288.2423 | 13289.2828  |
| 5         | 13288.0934 | 13289.3677  |
| 6         | 13287.9397 | 13289.4466  |
| 7         | 13287.7788 | 13289.5168  |
| 8         | 13287.6134 | 13289.5824  |
| 9         | 13287.4399 | 13289.6419  |
| 10        | 13287.2616 | 13289.6941  |
| 11        | 13287.0762 | 13289.7405  |
| 12        | 13286.8852 | 13289.7817  |
| 13        | 13286.6863 | 13289.8147  |
| 14        | 13286.4822 | 13289.8414  |
| 15        | 13286.2726 | 13289.8618  |
| 16        | 13286.0551 | 13289.8768* |
| 17        | 13285.8307 | 13289.8869* |
| 18        | 13285.6026 | 13289.8869* |
| 19        | 13285.3655 | 13289.8869* |
| 20        | 13285.1236 | 13289.8768* |
| 21        | 13284.8769 | 13289.8587  |
| 22        | 13284.6234 | 13289.8342  |
| 23        | 13284.3609 | 13289.8056  |
| 24        | 13284.0933 | 13289.7698  |
| 25        | 13283.8212 | 13289.7270  |
| 26        | 13283.5404 | 13289.6794  |
| 27        | 13283.2539 | 13289.6244  |
| 28        | 13282.9608 | 13289.5630  |
| 29        | 13282.6621 | 13289.4963  |
| 30        | 13282.3573 | 13289.4211  |
| 31        | 13282.0447 | 13289.3413  |
| 32        | 13281.7278 | 13289.2555  |
| 33        | 13281.4033 | 13289.1616  |
| 34        | 13281.0709 | 13289.0629  |
| 35        | 13280.7359 | 13288.9576  |
| 36        | 13280.3918 | 13288.8454  |
| 37        | 13280.0421 | 13288.7269  |
| 38        | 13279.6879 | 13288.6030  |
| 39        | 13279.3254 | 13288.4728  |
| 40        | 13278.9570 | 13288.3346  |
| 41        | 13278.5799 | 13288.1934  |
| 42        |            | 13288.0390  |
| 43        |            | 13287.8862  |
| 44        |            | 13287.7222  |
| 45        |            | 13287.5525  |
| 46        |            | 13287.3761  |
| 47        |            | 13287.1955  |

---

\*indicate overlapped with another line.
